# Supplementary material
Source: publisher figshare collection journal article supplement (https://acs.figshare.com/ndownloader/files/4181761)
Supplement: Supplementary file 1 [file 4181761]

## SUPPORTING INFORMATION

### One-step preparation of uniform cane-ball shaped water-swelling microgels containing poly(*N*-vinyl formamide)

Sineenat Thaiboonrod<sup>a</sup>, Francesco Cellesi<sup>b</sup>, Rein V. Ulijn<sup>c</sup> and Brian R. Saunders<sup>a,\*</sup>

<sup>a</sup> *Biomaterials Research Group, Manchester Materials Science Centre, School of Materials, The University of Manchester, Grosvenor Street, Manchester, M1 7HS, U.K.*

<sup>b</sup> *School of Pharmacy, The University of Manchester, Oxford Road, M13 9PT, U.K.*

<sup>c</sup> *Department of Pure and Applied Chemistry / WestCHEM, University of Strathclyde, Cathedral Street, Glasgow G1 1XL, UK*

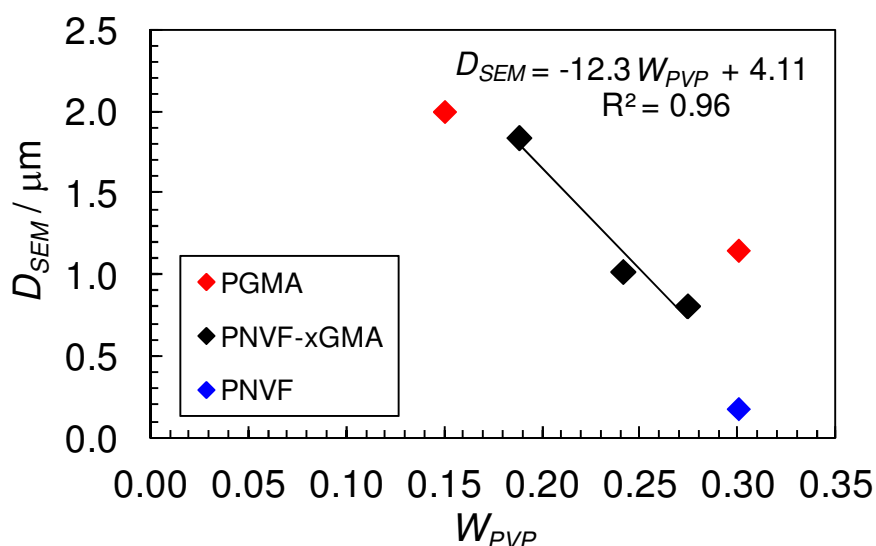

**Fig. S1.** Variation of the SEM number-average diameter with weight fraction of PVP (with respect to total monomer mass) used during dispersion preparation.

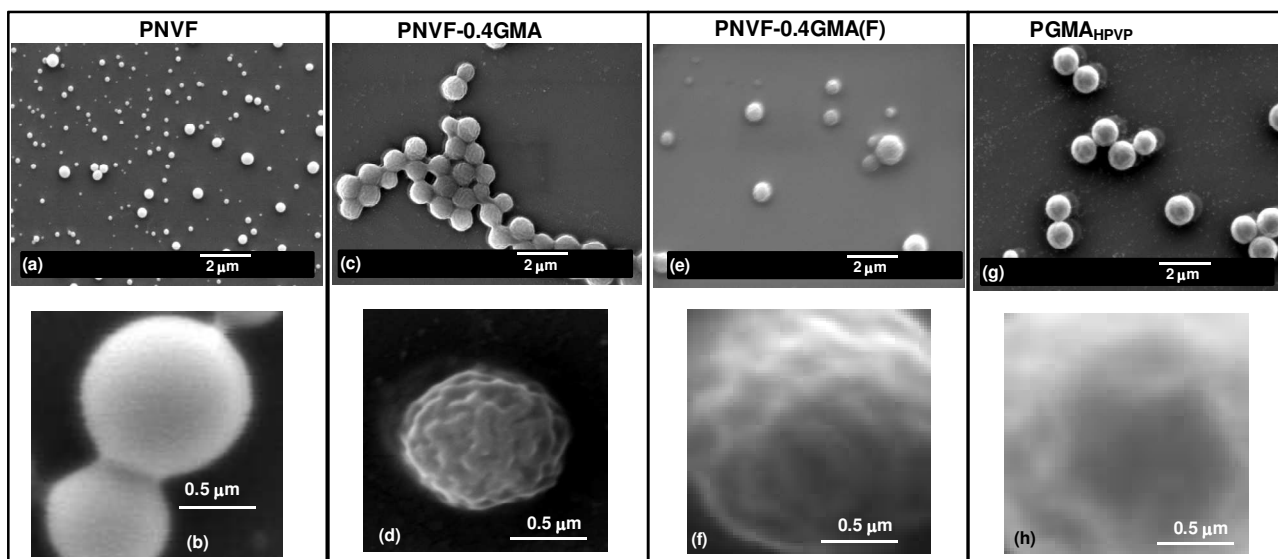

**Fig. S2. SEM images for polymer particles.** The identities of the particles are shown. The PNVF-0.4GMA particles for (c) and (d) were prepared for a total of 16 h reaction time.

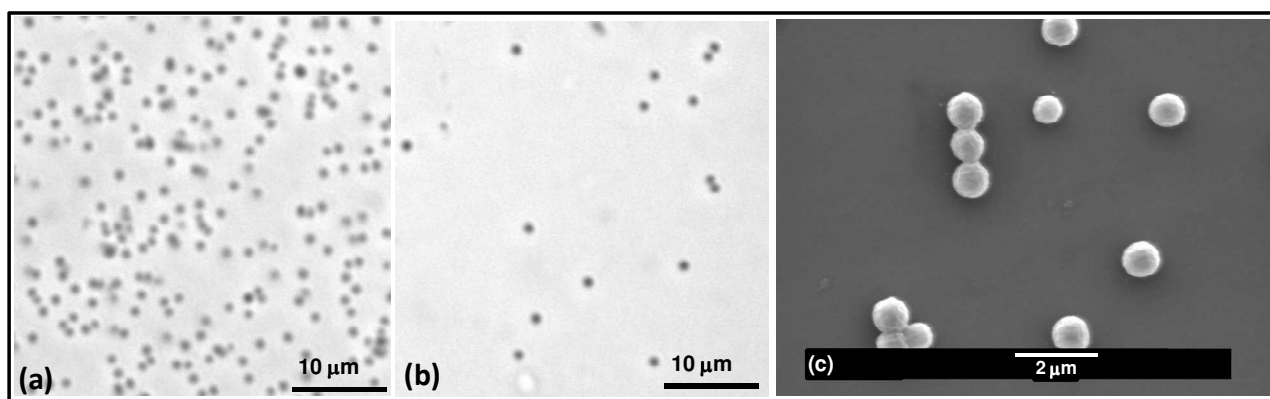

**Fig. S3. Micrographs of PNVF-0.4GMA particles dispersed in good solvents for the homopolymers.** Optical micrographs ((a) and (b)) and SEM image (c) of PNVF-0.4GMA particles dispersed in THF (a) and then dispersed in a larger volume of water after 24 h ((b) and (c)). For (b) the particle dilution factor was about 10.

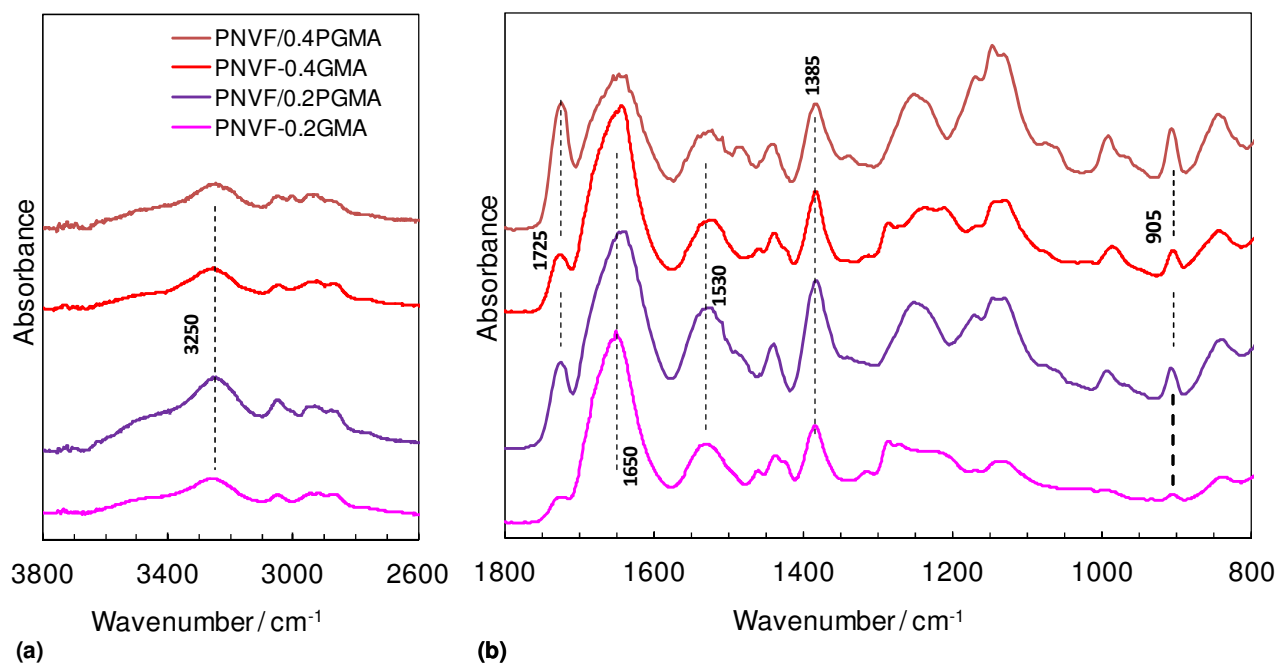

**Fig. S4.** FTIR spectra for PNVF-0.2GMA, PNVF-0.4GMA and also physical blends of PGMA and PNVF (PNVF/ $x$ PGMA) with the same mole ratios as the PNVF- $x$ GMA particles. The same legend applies to both figures.

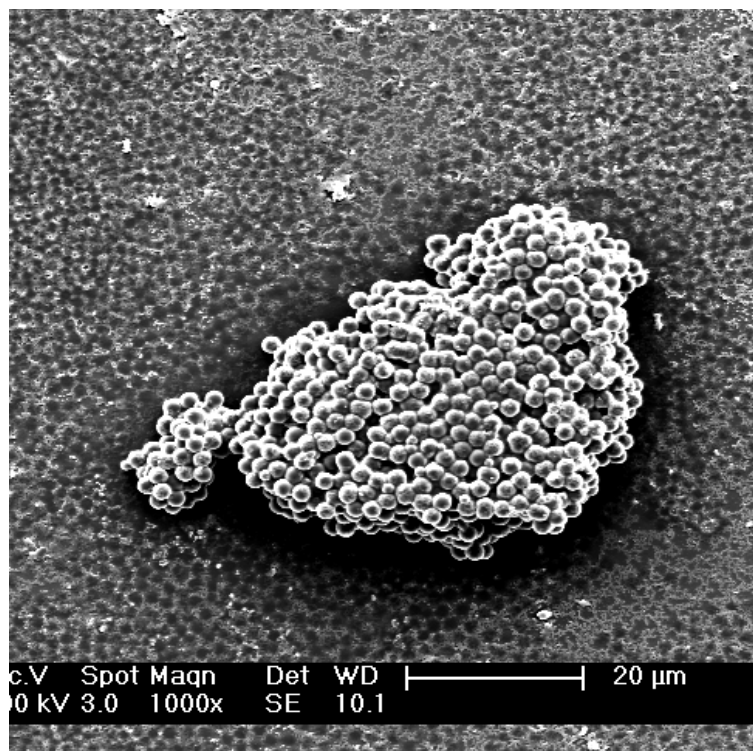

**Fig. S5.** SEM image of an aggregate that formed after a drop of water was placed on deposited H-PNVF-0.4GMA particles and allowed to evaporate overnight.

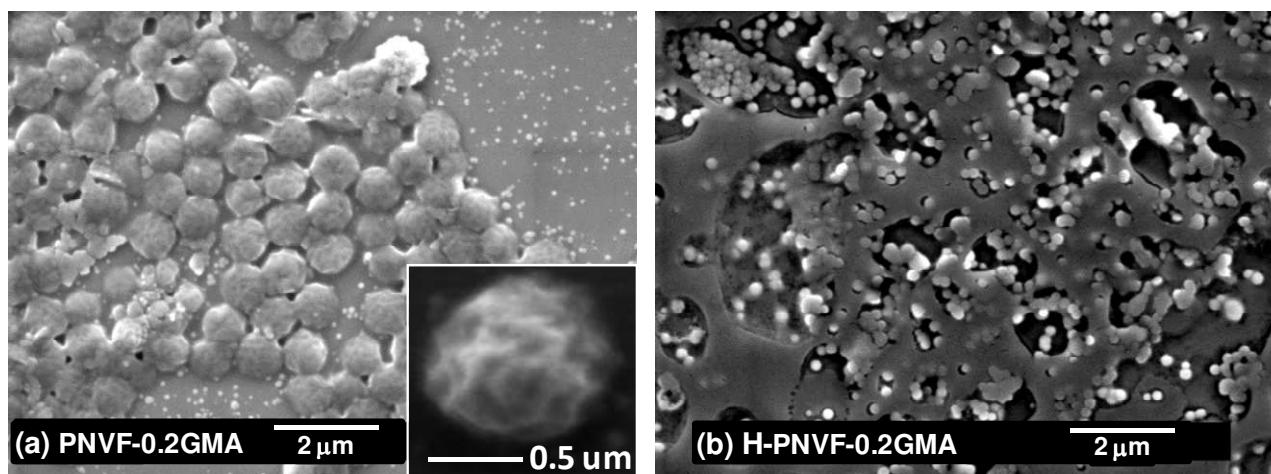

**Fig. S6. Hydrolysis of PNVF-0.2GMA particles.** (a) shows PNVF-0.2GMA particles dispersed in water (before hydrolysis). (b) shows H-PNVF-0.2GMA after hydrolysis by NaOH and deposited at pH = 11.3. The particles are no longer intact. The core has deposited as a polymer solution and fragmented shell is present.

**Table S1.** Microanalysis data

| Code                 | %C   | %H   | %N   |
|----------------------|------|------|------|
| PGMA                 | 59.0 | 7.2  | 0.2  |
| PNVF                 | 45.7 | 7.8  | 17.3 |
| PNVF-0.2GMA          | 49.9 | 7.6  | 14.7 |
| PNVF-0.4GMA          | 49.6 | 6.4  | 10.6 |
| PNVF-0.4GMA(F)       | 48.5 | 7.3  | 9.4  |
| H-PNVF-0.4GMA        | 49.9 | 7.9  | 8.5  |
| PVAM (24 h reaction) | 45.5 | 10.6 | 24.1 |
| PVAM (48 h reaction) | 45.2 | 11.0 | 24.3 |

<sup>a</sup> Calculated for PNVF-0.25GMA
